# Supplementary material for: Isoform-selective Hsp90 inhibition rescues model of hereditary open-angle glaucoma
Source: PubMed Central journal article supplement (PMC5738387; doi:10.1038/s41598-017-18344-4), 2017-12-20
Supplement: 41598_2017_18344_MOESM1_ESM.pdf [file 41598_2017_18344_MOESM1_ESM.pdf]

## **Isoform-selective Hsp90 inhibition rescues model of hereditary open-angle glaucoma**

Andrew R. Stothert<sup>1†</sup>, Amirthaa Suntharalingam<sup>1†</sup>, Xiaolan Tang<sup>1,2</sup>, Vincent M. Crowley<sup>3</sup>, Sanket J. Mishra<sup>3</sup>, Jack M. Webster<sup>1</sup>, Bryce A. Nordhues<sup>1</sup>, Dustin J. E. Huard<sup>4</sup>, Christopher Passaglia<sup>2</sup>, Raquel L. Lieberman<sup>4</sup>, Brian S. J. Blagg<sup>3</sup>, Laura J. Blair<sup>1\*</sup>, John Koren III<sup>1\*</sup>, Chad A. Dickey<sup>1‡</sup>

Affiliations:

<sup>1</sup>Department of Molecular Medicine and Byrd Alzheimer's Research Institute, University of South Florida, Tampa, FL, 33613, USA,

<sup>2</sup>Department of Chemical & Biomedical Engineering, College of Engineering, University of South Florida, Tampa, FL, 33613, USA,

<sup>3</sup>Department of Medicinal Chemistry, The University of Kansas, Lawrence, KS, 66045, USA and

<sup>4</sup>School of Chemistry & Biochemistry, Georgia Institute of Technology, Atlanta, GA, 30332, USA

<sup>†</sup>These authors contributed equally to the development of the manuscript

<sup>‡</sup>Deceased November, 2016.

\*Corresponding Authors:

Laura J. Blair

Assistant Professor

USF Health Byrd Institute

4001 E. Fletcher Ave., MDC 36

Tampa, FL 33613

(813)396-0639

[lblair@health.usf.edu](mailto:lblair@health.usf.edu)

John Koren III

Research Associate

USF Health Byrd Institute

4001 E. Fletcher Ave., MDC 36

Tampa, FL 33613

(813)396-0639

[jkoren@health.usf.edu](mailto:jkoren@health.usf.edu)

**Keywords:** GRP94, glaucoma, myocilin, chaperones, Hsp90

## Extended Data

### Extended Data Figure 1: Representative HPLC traces used for quantification of 4-Br-BnIm

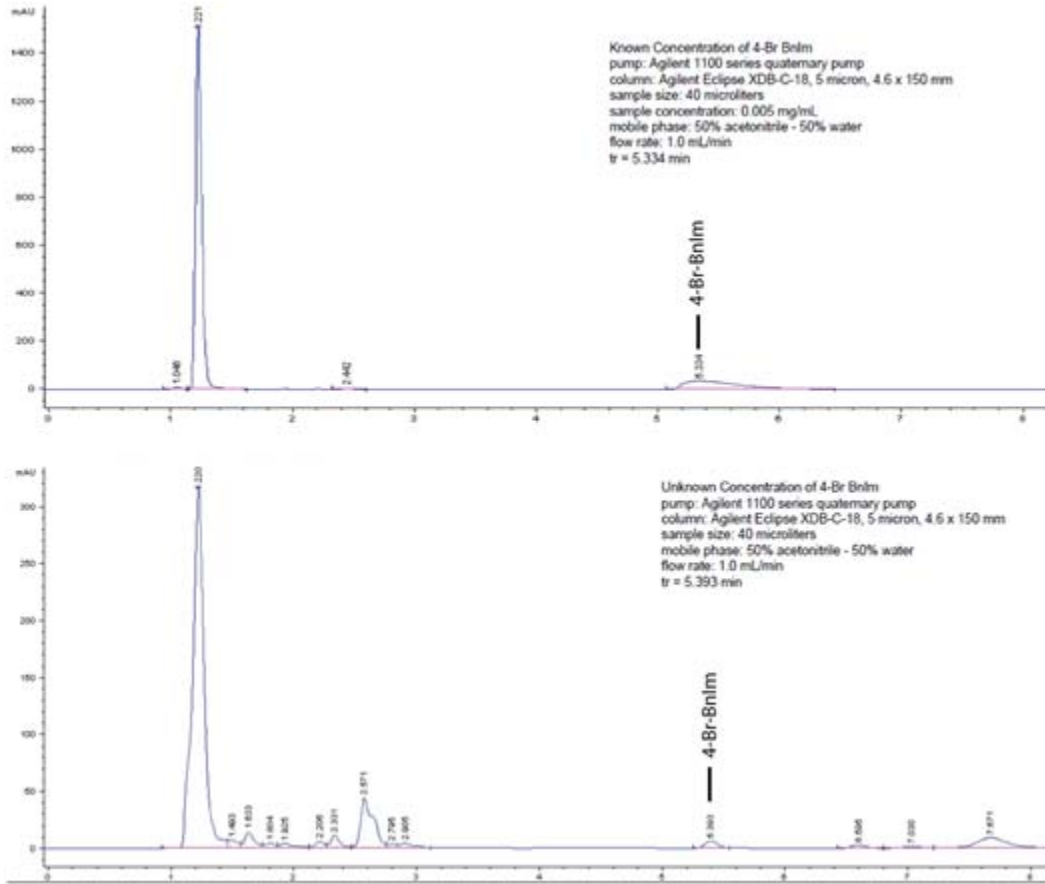

Upper trace represents one of the 4-Br-BnIm samples of known concentration that made up the standard curve. The lower trace represents an eye extract containing 4-Br-BnIm. The solvent front (MeOH) can be seen at 1.2 min and 4-Br-BnIm at ~5.3 minutes.

**Extended Data Table 1: Crystallographic statistics**

|                                                     | <b>NΔ41 in<br/>complex with<br/>4-Br-BnIm</b>  |
|-----------------------------------------------------|------------------------------------------------|
| <b>Data collection</b>                              |                                                |
| Space group                                         | P 2 <sub>1</sub> 2 <sub>1</sub> 2 <sub>1</sub> |
| Cell dimensions                                     |                                                |
| <i>a</i> , <i>b</i> , <i>c</i> (Å)                  | 65.237    84.42<br>95.473                      |
| <i>a</i> , <i>b</i> , <i>γ</i> (°)                  | 90 90 90                                       |
| Resolution (Å)                                      | 47.74 - 2.707 <sup>a</sup><br>(2.803 - 2.707)  |
| <i>R</i> <sub>merge</sub>                           | 0.121 (0.663)                                  |
| <i>I</i> / <i>σ</i> ( <i>I</i> )                    | 22.11 (4.41)                                   |
| <i>CC</i> <sub>1/2</sub>                            | 0.999 (0.954)                                  |
| Completeness (%)                                    | 97.71 (83.38)                                  |
| Redundancy                                          | 14.6 (14.9)                                    |
| <b>Refinement</b>                                   |                                                |
| Resolution (Å)                                      | 2.7                                            |
| No. reflections                                     | 217928 (21838)                                 |
| <i>R</i> <sub>work</sub> / <i>R</i> <sub>free</sub> | 0.1960<br>(0.2701)/<br>0.2839 (0.3822)         |
| No. atoms                                           |                                                |
| Protein                                             | 3307                                           |
| Ligand/ion                                          | 110                                            |
| (specify/describe)                                  |                                                |
| Water                                               | 38                                             |
| <i>B</i> factors                                    |                                                |
| Protein                                             | 51.6                                           |
| Ligand/ion                                          | 58.5                                           |
| Water                                               | 37.3                                           |
| R.m.s. deviations                                   |                                                |
| Bond lengths (Å)                                    | 0.009                                          |
| Bond angles (°)                                     | 1.26                                           |

<sup>a</sup> Values in parentheses are for highest-resolution shell.
